# Supplementary material
Source: Springer Nature journal article supplement (https://www.springermedizin.de/resource/supplementary/12936_2012_2155_MOESM6_ESM.pdf/9542752)

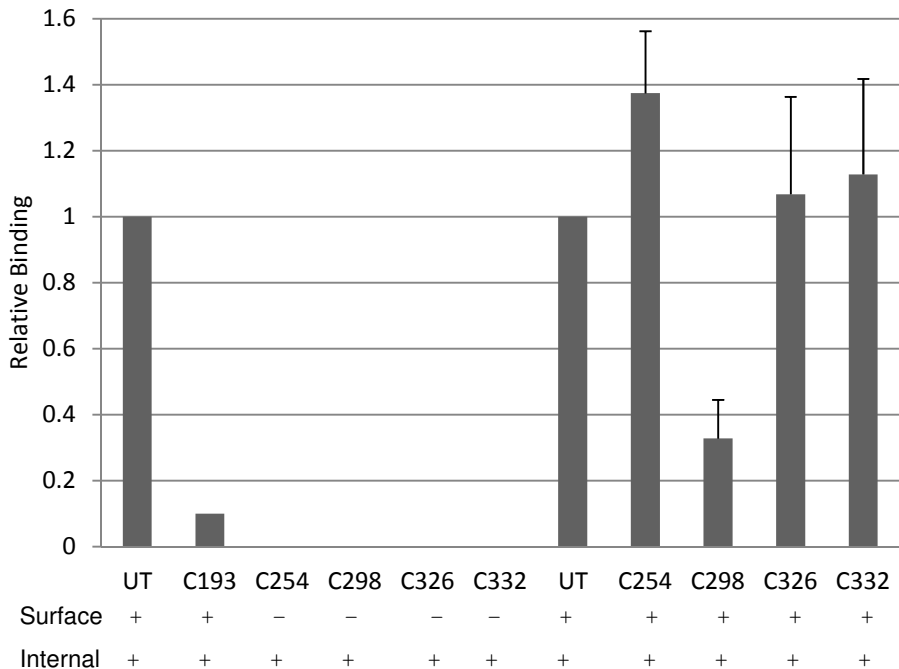

Supplement: MOESM6 [file 9542752]
